# Supplementary material for: Novel FOXM1 inhibitor identified via gene network analysis induces autophagic FOXM1 degradation to overcome chemoresistance of human cancer cells
Source: PubMed Central journal article supplement (PMC8280155; doi:10.1038/s41419-021-03978-0), 2021-07-14
Supplement: 41419_2021_3978_MOESM2_ESM.pdf [file 41419_2021_3978_MOESM2_ESM.pdf]

**Supplementary Table 1.** Human cancer cell lines used in the study.

| Cell line | Tissue of origin | Cancer type                      | FDA-approved drugs                                         | Additional features                                                    |
|-----------|------------------|----------------------------------|------------------------------------------------------------|------------------------------------------------------------------------|
| LNCaP     | Prostate         | Prostate carcinoma               | Docetaxel, enzalutamide, olaparib                          | Metastatic tumor                                                       |
| 22Rv1     |                  | Prostate carcinoma               |                                                            |                                                                        |
| PC3       |                  | Prostate carcinoma               |                                                            | Metastatic tumor, grade IV                                             |
| PEO1      | Ovary            | High grade serous adenocarcinoma | Cisplatin, carboplatin, oxaliplatin, paclitaxel, olaparib  | Platinum-sensitive                                                     |
| OVCAR3    |                  | High grade serous adenocarcinoma |                                                            | Platinum-sensitive                                                     |
| OVCAR8    |                  | High grade serous adenocarcinoma |                                                            | Platinum-resistant                                                     |
| SW480     | Colon            | Colorectal adenocarcinoma        | 5-FU, bevacizumab, irinotecan, oxaliplatin                 | Activating RAS mutation                                                |
| FET       |                  | Colon carcinoma                  |                                                            | Activating RAS mutation                                                |
| HCT116    |                  | Colorectal carcinoma             |                                                            | Activating RAS mutation                                                |
| A549      | Lung             | Lung adenocarcinoma              | Carboplatin, docetaxel, paclitaxel, bevacizumab, erlotinib |                                                                        |
| H1703     |                  | Non-small cell lung cancer       |                                                            |                                                                        |
| U2OS      | Bone             | Osteosarcoma                     | Doxorubicin, dactinomycin                                  | Was used to generate C3-luc cells expressing EGFP-FOXM1 fusion protein |

**Supplementary Table 4.** List of antibodies used for immunoblotting.

| Protein target                  | Antibody supplier,             | Antibody host and clone/ID     | Antibody working dilution |
|---------------------------------|--------------------------------|--------------------------------|---------------------------|
| FOXM1                           | Abcam, USA                     | Rabbit monoclonal, EPR17379    | 1:1,000                   |
| $\beta$ -actin                  | MilliporeSigma, USA            | Mouse monoclonal, AC-15        | 1:20,000                  |
| GFP                             | Thermo Fisher Scientific, USA  | Mouse monoclonal, GF28R        | 1:500                     |
| MCL1                            | Cell Signaling Technology, USA | Rabbit monoclonal, D5V5L       | 1:1,000                   |
| NPM                             | Santa Cruz Biotechnology       | Mouse monoclonal, FC82291      | 1:3,000                   |
| Cleaved caspase-3               | Cell Signaling Technology, USA | Rabbit monoclonal, 5A1E        | 1:1,000                   |
| LC3A/B                          | Cell Signaling Technology, USA | Rabbit monoclonal, D3U4C       | 1:3,000                   |
| LAMP1                           | Cell Signaling Technology, USA | Rabbit monoclonal, D2D11       | 1:3,000                   |
| anti-rabbit IgG, HRP-conjugated | Jackson Immunoresearch, USA    | Alpaca polyclonal, 611-035-215 | 1:10,000                  |
| anti-mouse IgG, HRP-conjugated  | Jackson Immunoresearch, USA    | Donkey polyclonal, 715-035-150 | 1:10,000                  |

**Supplementary Table 5.** List of primers used in RT-qPCR analysis.

| Gene            | Forward primer           | Reverse primer        |
|-----------------|--------------------------|-----------------------|
| <i>18S rRNA</i> | GACTCAACACGGGAAACCTC     | TCGCTCCACCAACTAAGAAC  |
| <i>TBP</i>      | GAGAGTTCTGGGATTGTACC     | GGATTATATTCGGCGTTTCG  |
| <i>FOXM1</i>    | CGAAAGATGAGTTCTGATGGAC   | TCCTCTCAGTGCTGTTGATG  |
| <i>EGFP</i>     | AGAAGAACGGCATCAAGGTG     | GTGCTCAGGTAGTGGTTGTC  |
| <i>MCL1</i>     | TGGCAAGAGGATTATGGCTAAC   | TTACACAGGTCACTGGCATTG |
| <i>AURKB</i>    | AAGGGAGAGCTGAAGATTGC     | TGAGCAGTTTGGAGATGAGG  |
| <i>CCNB1</i>    | TTTCGCCTGAGCCTATTTTG     | CCATCTTCTGCATCCACATC  |
| <i>CDK1</i>     | GATCTACCATAACCATTGACTAAC | ATGGCTACCACTTGACCTG   |
